# Supplementary material for: π–π interaction of aromatic groups in amphiphilic molecules directing for single-crystalline mesostructured zeolite nanosheets
Source: Springer Nature journal article supplement (doi:10.1038/ncomms5262), 2014-06-24
Supplement: 41467_2014_BFncomms5262_MOESM17_ESM.mol [file 41467_2014_BFncomms5262_MOESM17_ESM.mol]

  ChemDraw06121409232D

 24 25  0  0  0  0  0  0  0  0999 V2000
   -6.0706   -1.0306    0.0000 C   0  0  0  0  0  0  0  0  0  0  0  0
   -5.3561   -1.4431    0.0000 C   0  0  0  0  0  0  0  0  0  0  0  0
   -4.6417   -1.0306    0.0000 C   0  0  0  0  0  0  0  0  0  0  0  0
   -4.6417   -0.2056    0.0000 C   0  0  0  0  0  0  0  0  0  0  0  0
   -5.3561    0.2069    0.0000 C   0  0  0  0  0  0  0  0  0  0  0  0
   -6.0706   -0.2056    0.0000 C   0  0  0  0  0  0  0  0  0  0  0  0
   -3.9296    0.2056    0.0000 C   0  0  0  0  0  0  0  0  0  0  0  0
   -3.2151   -0.2069    0.0000 C   0  0  0  0  0  0  0  0  0  0  0  0
   -2.5006    0.2056    0.0000 C   0  0  0  0  0  0  0  0  0  0  0  0
   -2.5006    1.0306    0.0000 C   0  0  0  0  0  0  0  0  0  0  0  0
   -3.2151    1.4431    0.0000 C   0  0  0  0  0  0  0  0  0  0  0  0
   -3.9296    1.0306    0.0000 C   0  0  0  0  0  0  0  0  0  0  0  0
   -1.7886    1.4417    0.0000 O   0  0  0  0  0  0  0  0  0  0  0  0
   -1.0741    1.0292    0.0000 C   0  0  0  0  0  0  0  0  0  0  0  0
   -0.3596    1.4417    0.0000 C   0  0  0  0  0  0  0  0  0  0  0  0
    0.3548    1.0292    0.0000 C   0  0  0  0  0  0  0  0  0  0  0  0
    1.0693    1.4417    0.0000 C   0  0  0  0  0  0  0  0  0  0  0  0
    1.7838    1.0292    0.0000 C   0  0  0  0  0  0  0  0  0  0  0  0
    2.4982    1.4417    0.0000 C   0  0  0  0  0  0  0  0  0  0  0  0
    3.2127    1.0292    0.0000 C   0  0  0  0  0  0  0  0  0  0  0  0
    3.9272    1.4417    0.0000 C   0  0  0  0  0  0  0  0  0  0  0  0
    4.6417    1.0292    0.0000 C   0  0  0  0  0  0  0  0  0  0  0  0
    5.3561    1.4417    0.0000 C   0  0  0  0  0  0  0  0  0  0  0  0
    6.0706    1.0292    0.0000 Br  0  0  0  0  0  0  0  0  0  0  0  0
  1  2  2  0      
  2  3  1  0      
  3  4  2  0      
  4  5  1  0      
  5  6  2  0      
  6  1  1  0      
  4  7  1  0      
  7  8  2  0      
  8  9  1  0      
  9 10  2  0      
 10 11  1  0      
 11 12  2  0      
 12  7  1  0      
 13 10  1  0      
 14 13  1  0      
 15 14  1  0      
 16 15  1  0      
 17 16  1  0      
 18 17  1  0      
 19 18  1  0      
 20 19  1  0      
 21 20  1  0      
 22 21  1  0      
 23 22  1  0      
 24 23  1  0      
M  END
